# Supplementary material for: Recent Advances in Chemistry and Bioactivities of Secondary Metabolites from the Genus Acremonium
Source: MDPI journal article supplement (doi:10.3390/jof10010037), 2024-01-03
Supplement: s1 [file s1]

## Supplementary materials

### Recent advances in chemistry and bioactivities of secondary metabolites from the genus *Acremonium*

Yuning Qin †, Humu Lu †, Xin Qi, Miaoping Lin, Chenghai Gao, Yonghong Liu\* and Xiaowei Luo\*

Institute of Marine Drugs, Guangxi Key Laboratory of Marine Drugs, Guangxi University of Chinese Medicine, Nanning, 530200, China;

\* Correspondence: yonghongliu@scsio.ac.cn (Y.L.); luoxiaowei1991@126.com (X.L.)

† These authors contributed equally to this work.

**Table S1** Recent reported known compounds from the genus *Acremonium* (December 2016 to September 2023).

| Compounds                                                                                                                                                                                                                                                            | Producing strains                           | Sources                                      | Ref. |
|----------------------------------------------------------------------------------------------------------------------------------------------------------------------------------------------------------------------------------------------------------------------|---------------------------------------------|----------------------------------------------|------|
| trichodimerol,<br>dihydrotrichodimerol,<br>tetrahydrotrichodimerol                                                                                                                                                                                                   | <i>Acremonium citrinum</i> SS-g13           | the root of the plant<br><i>Fructus mori</i> | [8]  |
| cylindrol B,<br>LL-Z1272ε,<br>ilicicolin C,<br>ascochlorin, 4',5'-dihydro-4'-hydroxyascochlorin7,<br>10'-deoxy-10'α-hydroxyascochlorin,<br>ascofuranone,<br>ascofuranol,<br>10'-hydroxyilicicolinic acid D,<br>cylindrocarpol,<br>chlorocylindrocarpol,<br>LL-Z1272α | <i>Acremonium sclerotigenum</i> GXIMD 02501 | coral<br><i>Pocillopora damicornis</i>       | [10] |
| guignarderemophilane B,<br>guignarderemophilane E,<br>eremophil-1(10),11(12)-dien-2β,8β-diol,<br>2-oxo-3-hydroxyeremophila-1(10),3,7(11),8-tetraen-8,12-olide,<br>the C-2 epimer of PF1092B,<br>the C-3 epimer of PF1092C,<br>the C-2 epimer of PF1092C              | <i>Acremonium</i> sp. TVG-S004-0211         | deep-sea sediments                           | [15] |
| (-)-ternatin,<br>[D-Leu]-ternatin,<br>pseurotin A                                                                                                                                                                                                                    | <i>Acremonium</i> sp. SF-7394               | an unidentified lichen                       | [17] |

|                                             |                        |             |      |
|---------------------------------------------|------------------------|-------------|------|
| crotochin,                                  | <i>Acremonium</i>      | the petiole | [18] |
| trichothecin,                               | <i>crotochinigenum</i> | of the      |      |
| 8-deoxytrichothecinol B,                    | m BCC 20012            | brackish    |      |
| 4-((Z)-but-2-enoyloxy)-8,12-dihydroxy-7,    |                        | water palm  |      |
| 13-epoxytrichothecin-9-ene                  |                        | holothurian | [12] |
| virescenoside F,                            | <i>Acremonium</i>      |             |      |
| virescenoside G,                            | <i>striatisporum</i>   |             |      |
| lactone of virescenoside G,                 | KMM 4401               |             |      |
| aglycon of virescenoside A                  |                        |             |      |
| ascofuranone,                               | <i>Acremonium</i>      | -           | [19] |
| ascochlorin                                 | <i>egyptiacum</i>      |             |      |
| ascofuranone,                               | <i>Acremonium</i>      | -           | [20] |
| Rac-AF,                                     | <i>sclerotigenum</i>   |             |      |
| CCB,                                        |                        |             |      |
| (2E,6E)-8-(3-chloro-5-formyl-2,6-           |                        |             |      |
| dihydroxy-4-methylphenyl)-2,6-              |                        |             |      |
| dimethylocta-2,6-dien-1-yl pivalate,        |                        |             |      |
| 3-chloro-5-((2E,6E)-3,7-dimethyl-8-         |                        |             |      |
| ((tetrahydrofuran-2-yl)oxy)octa-2,6-dien-1- |                        |             |      |
| yl)-4,6-dihydroxy-2-methylbenzaldehyde,     |                        |             |      |
| 3-chloro-4,6-dihydroxy-5-((2E,6E)-8-        |                        |             |      |
| hydroxy-3,7-dimethylnona-2,6-dien-1-yl)-2-  |                        |             |      |
| methylbenzaldehyde, (3E,7E)-9-(3-chloro-    |                        |             |      |
| 5-formyl-2,6-dihydroxy-4-methylphenyl)-     |                        |             |      |
| 3,7-dimethylnona-3,7-dien-2-yl acetate,     |                        |             |      |
| 3-chloro-4,6-dihydroxy-2-methyl-5-          |                        |             |      |
| ((2E,6E)-3,7,11-trimethyldodeca-2,6,10-     |                        |             |      |
| trien-1-yl)benzaldehyde,                    |                        |             |      |
| methyl(2E,6E)-8-(3-chloro-5-formyl-2,6-     |                        |             |      |
| dihydroxy-4-methylphenyl)-2,6-              |                        |             |      |
| dimethylocta-2,6-dienoate,                  |                        |             |      |
| ascochlorin,                                |                        |             |      |
| (2E,6E)-8-(3-chloro-5-formyl-2,6-           |                        |             |      |
| dihydroxy-4-methylphenyl)-3,6-              |                        |             |      |
| dimethylocta-2,6-dien-1-yl pivalate,        |                        |             |      |
| (2E,6E)-8-(3-chloro-5-formyl-2,6-           |                        |             |      |
| dihydroxy-4-methylphenyl)-3,6-              |                        |             |      |
| dimethylocta-2,6-dien-1-yl isobutyrate,     |                        |             |      |
| (2E,6E)-8-(3-chloro-5-formyl-2,6-           |                        |             |      |
| dihydroxy-4-methylphenyl)-2-methylocta-     |                        |             |      |
| 2,6-dien-1-yl pivalate,                     |                        |             |      |
| 8-(3-chloro-5-formyl-2,6-dihydroxy-4-       |                        |             |      |
| methylphenyl)-2,6-dimethyloctyl pivalate,   |                        |             |      |
| (E)-7-(3-chloro-5-formyl-2,6-dihydroxy-4-   |                        |             |      |

|                                                                                                                                                                                                                                                                                                                                                                                                                                                                                                                                                                                                                                                                                                                                                                                                                                                                          |                                                             |                                                  |      |
|--------------------------------------------------------------------------------------------------------------------------------------------------------------------------------------------------------------------------------------------------------------------------------------------------------------------------------------------------------------------------------------------------------------------------------------------------------------------------------------------------------------------------------------------------------------------------------------------------------------------------------------------------------------------------------------------------------------------------------------------------------------------------------------------------------------------------------------------------------------------------|-------------------------------------------------------------|--------------------------------------------------|------|
| methylphenyl)-5-methylhept-5-en-1-yl<br>pivalate,<br>7-(3-chloro-5-formyl-2,6-dihydroxy-4-<br>methylcyclohexa-1,3-dien-1-yl)-5-<br>methylheptyl pivalate,<br>(E)-3-chloro-4,6-dihydroxy-2-methyl-5-(3-<br>methyloct-2-en-1-yl)benzaldehyde,<br>3-chloro-4,6-dihydroxy-2-methyl-5-(3-<br>methyloctyl)benzaldehyde,<br>5-((6E)-8-(3-acetyl-5-chloro-2,6-dihydroxy-<br>4-methylphenyl)-6-methylocta-2,6-dien-2-<br>yl)-2,2-dimethyldihydrofuran-3(2H)-one,<br>(2E,6E)-8-(3-chloro-2,6-dihydroxy-5-<br>(hydroxymethyl)-4-methylphenyl)-2,6-<br>dimethylocta-2,6-dien-1-yl pivalate,<br>4-chloro-5-((2E,6E)-7-((R)-5,5-dimethyl-4-<br>oxotetrahydrofuran-2-yl)-3-methylocta-2,6-<br>dien-1-yl)-6-hydroxy-4-methoxy-2-<br>methylbenzaldehyde,<br>colletorin B,<br>(E)-3-chloro-5-(3,7-dimethylocta-2,6-dien-<br>1-yl)-4,6-dihydroxy-2-methylbenzaldehyde<br>3-bromoascochlorin | <i>Acremonium</i><br><i>sclerotigenum</i><br>GXIMD<br>02501 | coral<br><i>Pocillopora</i><br><i>damicornis</i> | [21] |
| ascofuranone                                                                                                                                                                                                                                                                                                                                                                                                                                                                                                                                                                                                                                                                                                                                                                                                                                                             | <i>Acremonium</i><br><i>egyptiacum</i>                      | -                                                | [23] |
| ascochlorin,<br>cylindrol B,<br>ilicicolin E,<br>ilicicolin C,<br>LL-Z1272ε,<br>10'-deoxy-10'α-hydroxyascochlorin,<br>ascofuranol,<br>ascofuranone,<br>chlorocylindrocarpol                                                                                                                                                                                                                                                                                                                                                                                                                                                                                                                                                                                                                                                                                              | <i>Acremonium</i><br><i>furcatum</i> CS-<br>280             | sediment<br>samples                              | [24] |
| ascochlorin,<br>10'-deoxy10'α-hydroxyascochlorin,<br>4',5'-dihydro-4'-hydroxyascochlorin,<br>ascofuranone,<br>PF1171A                                                                                                                                                                                                                                                                                                                                                                                                                                                                                                                                                                                                                                                                                                                                                    | <i>Acremonium</i><br>sp. IMB18-<br>086                      | the sponge<br><i>Haliclona</i><br>sp.            | [25] |
| lumichrome,<br>ergosterol,                                                                                                                                                                                                                                                                                                                                                                                                                                                                                                                                                                                                                                                                                                                                                                                                                                               | <i>Acremonium</i><br><i>persicinum</i>                      | marine<br>sponge                                 | [26] |

|                                                                                                           |                                                                               |                                                                                             |      |
|-----------------------------------------------------------------------------------------------------------|-------------------------------------------------------------------------------|---------------------------------------------------------------------------------------------|------|
| ergosterol 5,8-endoperoxide<br>acremonin A glucoside                                                      | KUFA 1007<br><i>Acremonium</i><br><i>masseei</i><br>CICY026                   | <i>Mycale</i> sp.<br>plant litter                                                           | [27] |
| fusidic acid,<br>16-desacetyl fusidic acid,<br>3 $\beta$ ,20-dihydroxy-protosta-16,24-dien-29-oic<br>acid | <i>Acremonium</i><br><i>pilosum</i> F47                                       | the pedicel<br>of the<br>Chinese<br>medicinal<br>plant<br><i>Mahonia</i><br><i>fortunei</i> | [28] |
| adenopeptin                                                                                               | <i>Acremonium</i><br>sp. PF1450                                               | sediments                                                                                   | [29] |
| XR586                                                                                                     | <i>Acremonium</i><br><i>persicinum</i><br>SC0105                              | sediments                                                                                   | [30] |
| destruxin B,<br>guangomide A,<br>guangomide B<br>Al(III)-acremonopeptide D                                | <i>Acremonium</i><br>sp. NTU492                                               | marine alga<br><i>Mastophora</i><br><i>rosea</i>                                            | [32] |
|                                                                                                           | <i>Acremonium</i><br><i>persicinum</i><br>SCSIO 115                           | marine<br>sediments                                                                         | [33] |
| Ga (III) - Acremonopeptide E,<br>Ga (III) - Acremonopeptide F,<br>aselacin C                              | <i>Acremonium</i><br><i>persicinum</i><br>F10                                 | marine<br>sponge<br><i>Phakellia</i><br><i>fusca</i>                                        | [35] |
| 3,3',6,6'-tetrahydroxy-4,4'-dimethyl-1,1'-bi-<br>p-benzoquinon                                            | <i>Acremonium</i><br><i>cavaraeanum</i><br>CA022                              | fruiting<br>bodies of<br><i>Shiraia</i><br><i>bambusicola</i>                               | [36] |
| $\beta$ -adenosine,<br>acrepyrone A                                                                       | <i>Acremonium</i><br><i>citrinum</i> .<br>MMF4                                | the root of<br>mangrove<br>plant<br><i>Kandelia</i><br><i>obovata</i>                       | [37] |
| (3 <i>R</i> ,4 <i>R</i> )-3,4-dihydro-3,4,8-trihydroxy-<br>1(2 <i>H</i> )-naphthalenone                   | <i>Pleosporales</i><br>sp. F46 and<br><i>Acremonium</i><br><i>pilosum</i> F47 | the pedicel<br>of the<br>medicinal<br>plant<br><i>Mahonia</i><br><i>fortunei</i>            | [38] |
| aversin,<br>6,8-di- <i>O</i> -methylaverufin,                                                             | <i>Acremonium</i><br><i>vitellinum</i>                                        | the fresh<br>inner tissue                                                                   | [39] |

|                                                                                                                                                                                                                                                                                                  |                                             |                                                          |      |
|--------------------------------------------------------------------------------------------------------------------------------------------------------------------------------------------------------------------------------------------------------------------------------------------------|---------------------------------------------|----------------------------------------------------------|------|
| 6,8-di- <i>O</i> -methylnidurufin                                                                                                                                                                                                                                                                | MH726097                                    | of an unidentified marine red alga                       |      |
| orsellinic acid,<br>ethyl orsellinate,<br>5-chloroorsellinic acid,<br>orcinol,<br><i>O</i> -methylorcinol,<br>2-chloro-3,5-dihydroxytoluene,<br>aryl bromide,<br>ethyl 4-hydroxyphenylacetate,<br>(3 <i>S</i> )-3,5-dimethyl-8-methoxy-3,4-dihydro-1 <i>H</i> -isochromen-6-ol,<br>nectriatone C | <i>Acremonium sclerotigenum</i> GXIMD 02501 | coral<br><i>Pocillopora damicornis</i>                   | [40] |
| 5 $\alpha$ ,8 $\alpha$ -epidioxy ergosta-6,22-diene-3 $\beta$ -ol,<br>microperfuranone                                                                                                                                                                                                           | <i>Acremonium fusidioides</i> RZ01          | sea water                                                | [41] |
| sorbiquinol,<br>(2 <i>E</i> ,4 <i>E</i> )-1-(2,6dihydroxy-3,5-dimethyl-phenyl)hexa-2,4-dien-1-one,<br>clavatul,<br>sorbicillin,<br>4-hydroxybenzoic acid,<br><i>N</i> -(2-hydroxyphenyl)-acetamide,<br>trichodimerol,<br>dihydrotrichodimerol,<br>tetrahydrotrichodimerol                        | <i>Acremonium</i> sp. AN-13                 | marine sediments                                         | [43] |
| trichotetronine,<br>dihydrotrichotetronine,<br>10,11-dihydrobislongiquinolide,<br>10,11,16,17-tetrahydrobislongiquinolide,<br>bisvertinolone,<br>dihydrobisvertinolone,<br>tetrahydrobisvertinolone,<br>penicillone B                                                                            | <i>Acremonium citrinum</i> SS-g13           | the root of the terrestrial plant<br><i>Fructus mori</i> | [44] |
| trichotetronine,<br>trichodimerol,<br>demethyltrichodimerol,<br>trichopyrone,<br>oxosorbicillinol                                                                                                                                                                                                | <i>Acremonium chrysogenum</i> C10           | -                                                        | [45] |
| tetrahydrotrichodimerol,<br>dihydrotrichodimerol,<br>lactariamide B,                                                                                                                                                                                                                             | <i>Acremonium alternatum</i>                | the deep-sea sediments                                   | [46] |

|                                                                                                                                                                                                                                                                                                                                                                              |                                                                                                       |                                                                                                                    |           |
|------------------------------------------------------------------------------------------------------------------------------------------------------------------------------------------------------------------------------------------------------------------------------------------------------------------------------------------------------------------------------|-------------------------------------------------------------------------------------------------------|--------------------------------------------------------------------------------------------------------------------|-----------|
| (2 <i>S</i> ,2' <i>R</i> ,3 <i>R</i> ,4 <i>E</i> ,8 <i>E</i> ,3' <i>E</i> )-2-(2'-hydroxy-3-octadecenoylamino)-9-methyl-4,8-octadecadiene-1,3-diol,<br>(22 <i>E</i> ,24 <i>R</i> )-ergosta-5,7,22-trien-3 $\beta$ -ol,<br>ergosterol endoperoxide,<br>6- <i>O</i> -acetyl-NGA0187,<br>7-NGA0187                                                                              |                                                                                                       |                                                                                                                    |           |
| (22 <i>E</i> )5 $\alpha$ ,8 $\alpha$ -epidioxyergosta-6,22-dien-3 $\beta$ -ol,<br>(22 <i>E</i> ,24 <i>R</i> )3 $\beta$ ,5 $\alpha$ ,9 $\alpha$ ,14 $\alpha$ -tetrahydroxyergosta-7,22-dien-6-one,<br>(22 <i>E</i> ,24 <i>R</i> )-3 $\beta$ -hydroxy-5,9-epoxyergosta-7,22-dien-6-one<br>fusidic acid,                                                                        | <i>Acremonium</i><br>sp. NBUF150                                                                      | the sponge<br><i>Ciocalypa</i><br>sp.                                                                              | [47]      |
| (22 <i>E</i> ,24 <i>R</i> )-5 $\alpha$ ,8 $\alpha$ -epidioxy-ergosta-6,22dien-3 $\beta$ -ol,<br>(3 $\beta$ ,5 $\alpha$ ,22 <i>E</i> ,24 <i>R</i> )-dihydroxy-ergosta7,22-dien-6-one,<br>(3 $\beta$ ,5 $\alpha$ ,6 $\beta$ ,22 <i>E</i> ,24 <i>R</i> )-trihydroxy-ergosta-7,22-dien-6-one<br>3 $\beta$ ,5 $\alpha$ ,6 $\beta$ ,7 $\alpha$ -tetrahydroxyergosta-8(14),22-diene | <i>Acremonium</i><br><i>pilosum</i> F47                                                               | the pedicel<br>of the<br>Chinese<br>medicinal<br>plant<br><i>Mahonia</i><br><i>fortune</i>                         | [48]      |
| chloramphenicol,<br>corynecin-I                                                                                                                                                                                                                                                                                                                                              | <i>Acremonium</i><br><i>persicinum</i>                                                                | fungi in<br>plant<br>materials,<br>sediments<br>and water<br>samples                                               | [49]      |
|                                                                                                                                                                                                                                                                                                                                                                              | <i>Acremonium</i><br><i>vitellinum</i><br>MH726097                                                    | fresh inner<br>tissue of an<br>unidentified<br>marine red<br>alga                                                  | [50]      |
| campyridone D,<br>campyridone A,<br>ilicicolin H,<br>phenazine-1-carboxylic acid<br>acremine P,<br>acremine A,<br>acremine Q                                                                                                                                                                                                                                                 | <i>Acremonium</i><br><i>sclerotigenum</i><br>GXIMD<br>02501<br><i>Acremonium</i><br><i>persicinum</i> | coral<br><i>Pocillopora</i><br><i>damicornis</i><br>the marine<br>sponge<br><i>Anomoianth</i><br><i>ella rubra</i> | [52]<br>- |

**Chemical structures of recent reported known compounds from the genus *Acremonium* (December 2016 to September 2023).**

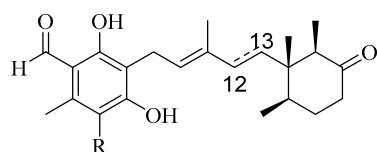

cylindrol B, R = H,  $\Delta^{12(13)}$

LL-Z1272, R = H,

ilicicolin C, R = Cl,

ascochlorin, R = H,  $\Delta^{12(13)}$

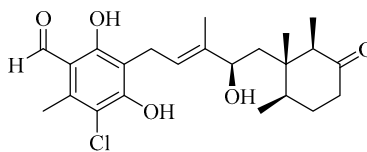

4',5'-dihydro-4'-hydroxyascochlorin

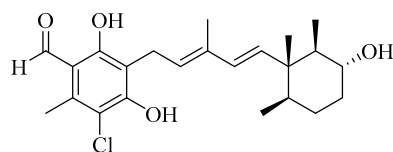

10'-deoxy-10'α-hydroxyascochlorin

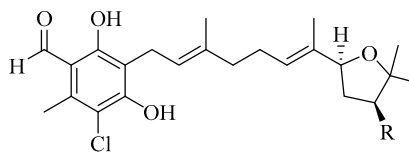

ascofuranone, R = O

ascofuranol, R = OH

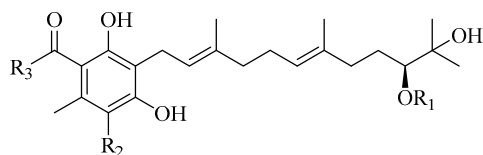

10'-hydroxyilicicolinic acid D, R<sub>1</sub> = H, R<sub>2</sub> = Cl, R<sub>3</sub> = OH

cylindrocarpol,

R<sub>1</sub> = R<sub>2</sub> = R<sub>3</sub> = H

chlorocylindrocarpol,

R<sub>1</sub> = R<sub>3</sub> = H, R<sub>2</sub> = Cl

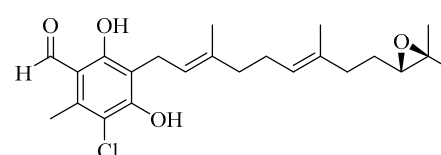

LL-Z1272α

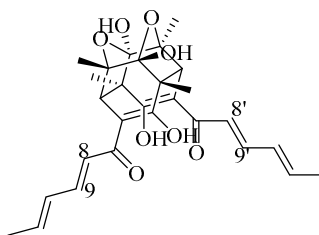

trichodimerol

dihydrotrichodimerol : 8,9-dihydro

tetrahydrotrichodimerol : 4,8,9-dihydro 8',9'-dihydro

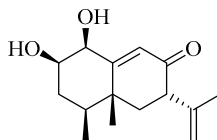

guignarderemophilane B

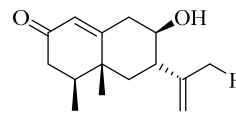

guignarderemophilane E

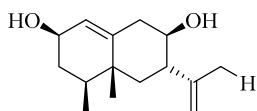

eremophil-1(10),11(12)-dien-2β,8β-diol

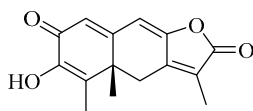

2-oxo-3-hydroxyeremophila-1(10),3,7(11),8-tetraen-8,12-olide

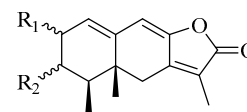

the C-2 epimer of PF1092B, R<sub>1</sub> = 2α-OH, R<sub>2</sub> = 3β-OAc

the C-3 epimer of PF1092C, R<sub>1</sub> = 2β-OH, R<sub>2</sub> = 3α-OH

the C-2 epimer of PF1092C, R<sub>1</sub> = 2α-OH, R<sub>2</sub> = 3β-OH

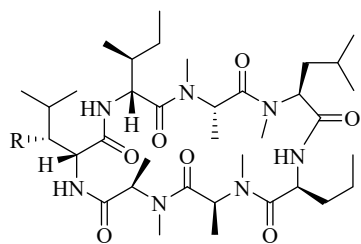

(-)-ternatin, R = OH  
[D-Leu]-ternatin, R = H

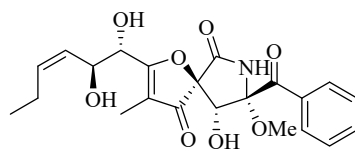

pseurotin A

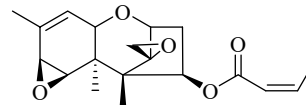

crotozin

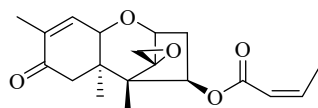

trichothecin

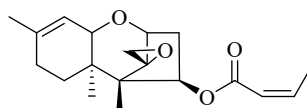

8-deoxytrichothecinol B

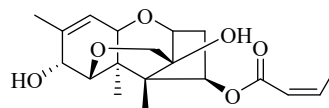

4-((Z)-but-2-enyloxy)-8,12-dihydroxy-7,13-epoxytrichothec9-ene

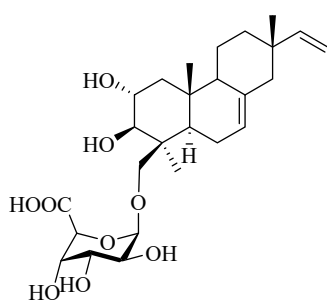

viresenoside F

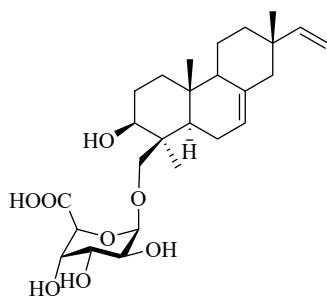

viresenoside G

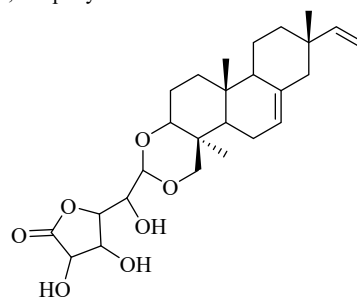

lactone of viresenoside G

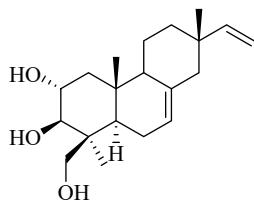

aglycon of viresenoside A

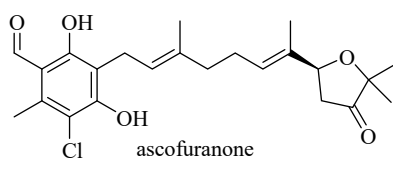

ascofuranone

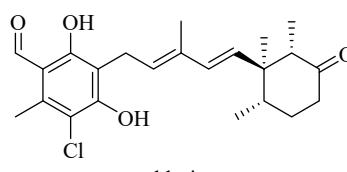

asochlorin

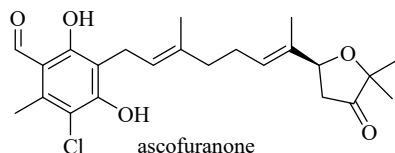

ascofuranone

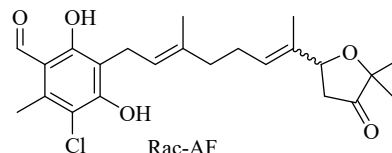

Rac-AF

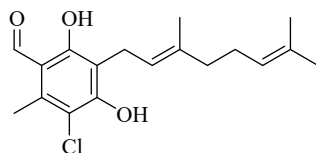

CCB

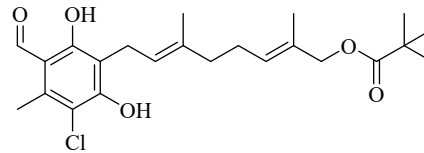

(2E,6E)-8-(3-chloro-5-formyl-2,6-dihydroxy-4-methylphenyl)-2,6-dimethylocta-2,6-dien-1-yl pivalate



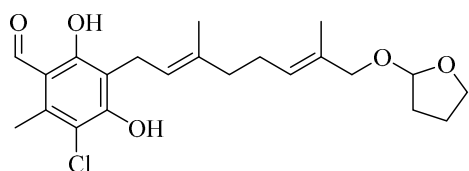

3-chloro-5-((2*E*,6*E*)-3,7-dimethyl-8-((tetrahydrofuran-2-yl)oxy)octa-2,6-dien-1-yl)-4,6-dihydroxy-2-methylbenzaldehyde

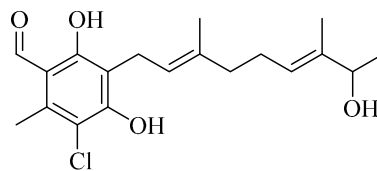

3-chloro-4,6-dihydroxy-5-((2*E*,6*E*)-8-hydroxy-3,7-dimethylnona-2,6-dien-1-yl)-2-methylbenzaldehyde

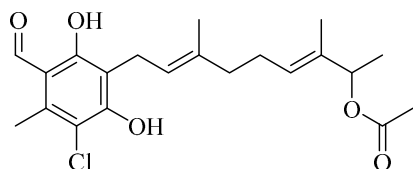

(3*E*,7*E*)-9-(3-chloro-5-formyl-2,6-dihydroxy-4-methylphenyl)-3,7-dimethylnona-3,7-dien-2-yl acetate

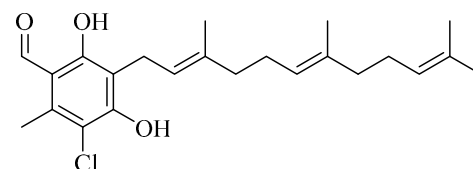

3-chloro-4,6-dihydroxy-2-methyl-5-((2*E*,6*E*)-3,7,11-trimethyldodeca-2,6,10-trien-1-yl)benzaldehyde

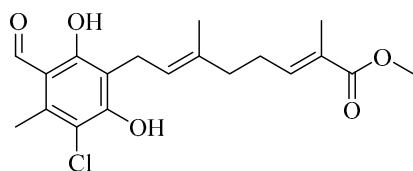

methyl (2*E*,6*E*)-8-(3-chloro-5-formyl-2,6-dihydroxy-4-methylphenyl)-2,6-dimethylocta-2,6-dienoate

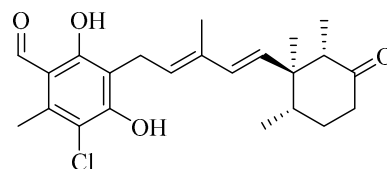

ascochlorin

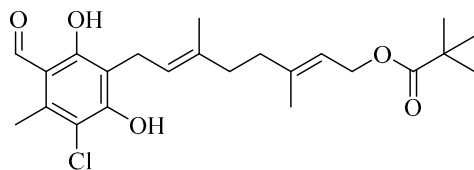

(2*E*,6*E*)-8-(3-chloro-5-formyl-2,6-dihydroxy-4-methylphenyl)-3,6-dimethylocta-2,6-dien-1-yl pivalate

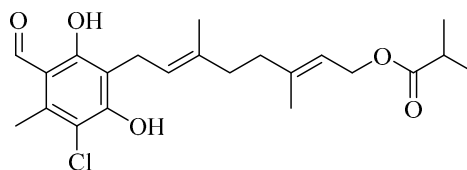

(2*E*,6*E*)-8-(3-chloro-5-formyl-2,6-dihydroxy-4-methylphenyl)-3,6-dimethylocta-2,6-dien-1-yl isobutyrate

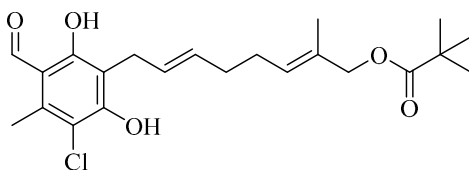

(2*E*,6*E*)-8-(3-chloro-5-formyl-2,6-dihydroxy-4-methylphenyl)-2-methylocta-2,6-dien-1-yl pivalate

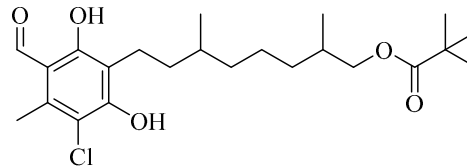

8-(3-chloro-5-formyl-2,6-dihydroxy-4-methylphenyl)-2,6-dimethyloctyl pivalate

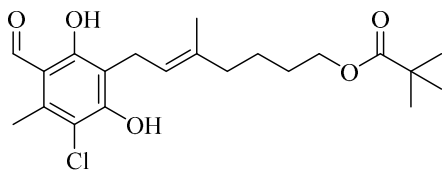

(*E*)-7-(3-chloro-5-formyl-2,6-dihydroxy-4-methylphenyl)-5-methylhept-5-en-1-yl pivalate

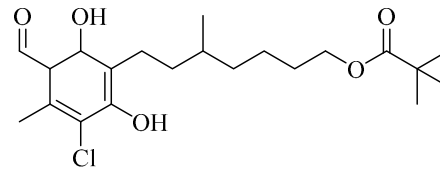

7-(3-chloro-5-formyl-2,6-dihydroxy-4-methylcyclohexa-1,3-dien-1-yl)-5-methylheptyl pivalate

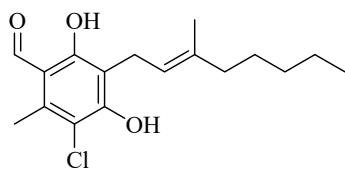

(*E*)-3-chloro-4,6-dihydroxy-2-methyl-5-(3-methyloct-2-en-1-yl)benzaldehyde

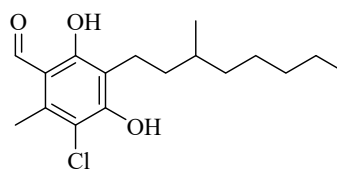

3-chloro-4,6-dihydroxy-2-methyl-5-(3-methyloctyl)benzaldehyde

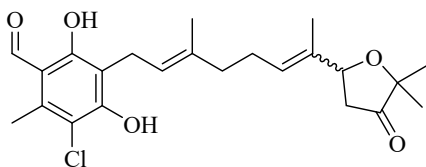

3-chloro-5-((*2E*)-7-(5,5-dimethyl-4-oxotetrahydrofuran-2-yl)-3-methylocta-2,6-dien-1-yl)-4,6-dihydroxy-2-methylbenzaldehyde

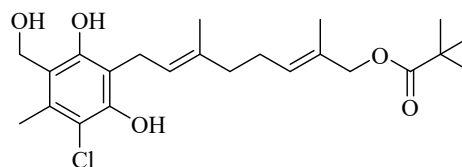

(*2E,6E*)-8-(3-chloro-2,6-dihydroxy-5-(hydroxymethyl)-4-methylphenyl)-2,6-dimethylocta-2,6-dien-1-yl pivalate

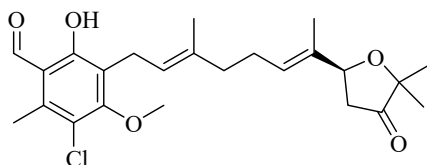

3-chloro-5-((*2E,6E*)-7-((*S*)-5,5-dimethyl-4-oxotetrahydrofuran-2-yl)-3-methylocta-2,6-dien-1-yl)-6-hydroxy-4-methoxy-2-methylbenzaldehyde

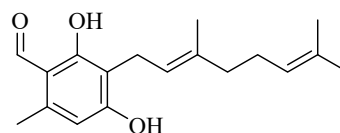

colletorin B

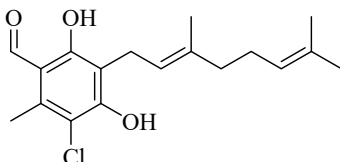

(*E*)-3-chloro-5-(3,7-dimethylocta-2,6-dien-1-yl)-4,6-dihydroxy-2-methylbenzaldehyde

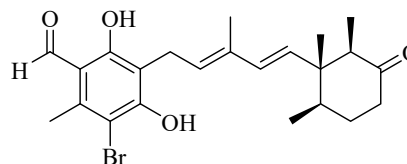

3-bromoascochlorin

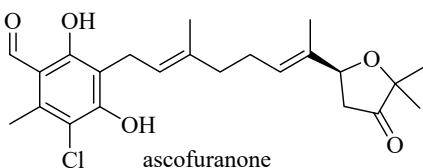

ascofuranone

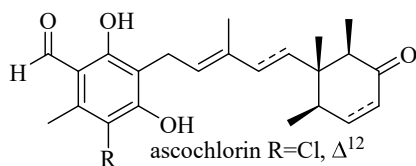

ascochlorin R=Cl,  $\Delta^{12}$   
cylindrol B R=H,  $\Delta^{12}$   
ilicicolin E R=Cl,  $\Delta^{12, 16}$   
ilicicolin C R=Cl  
LL-Z1272ε R=H

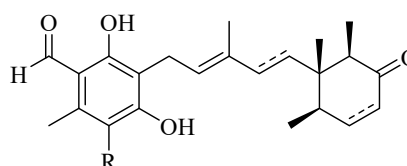

10'-deoxy-10'a-hydroxyascochlorin

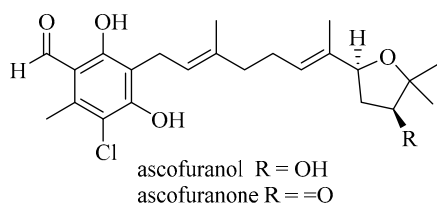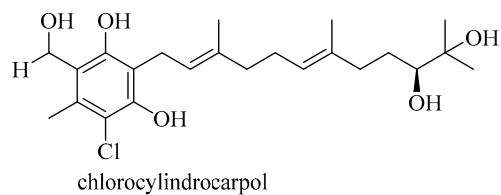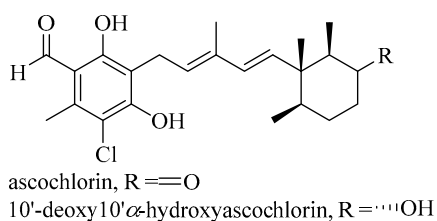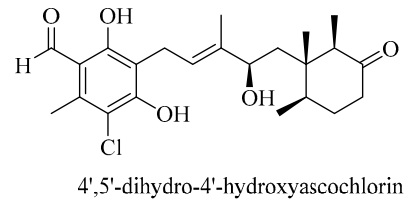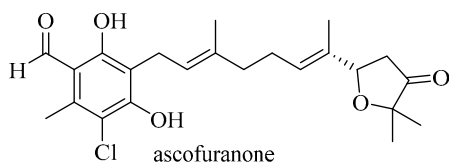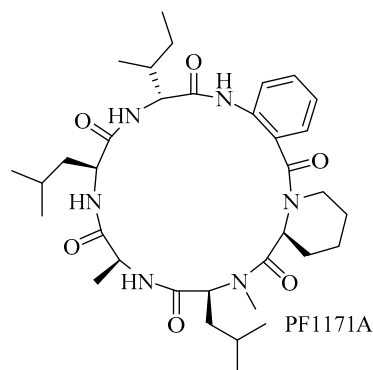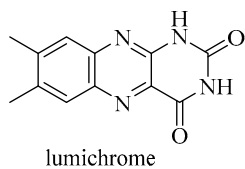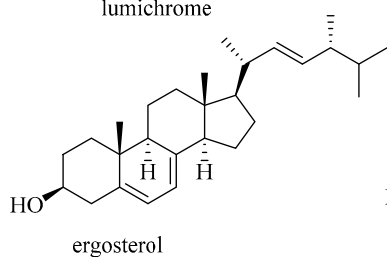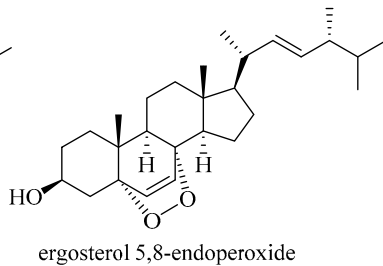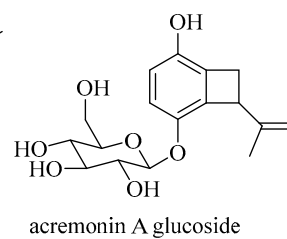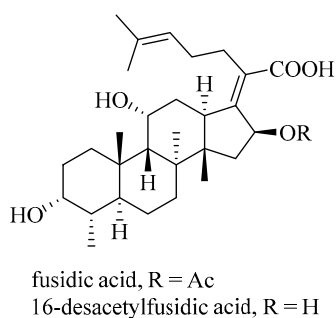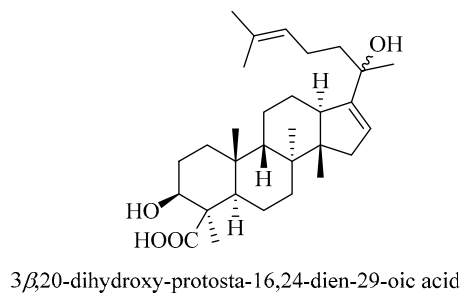

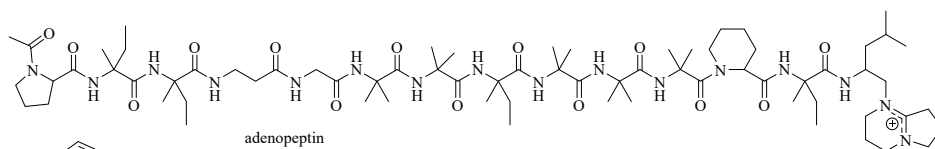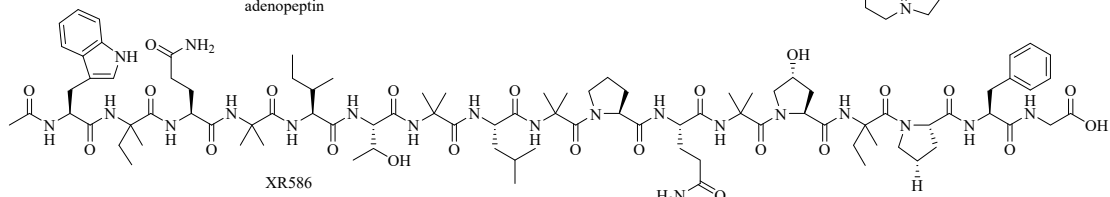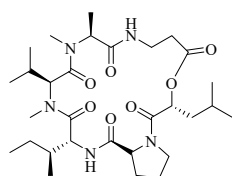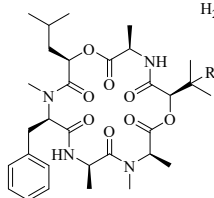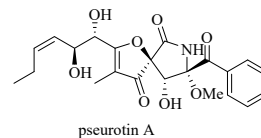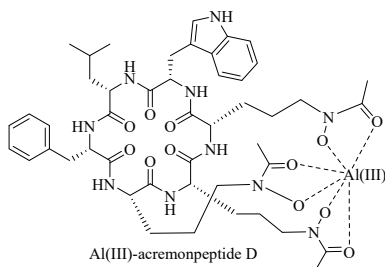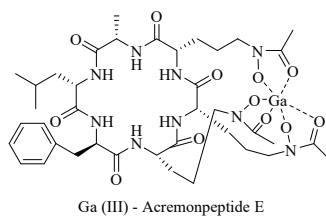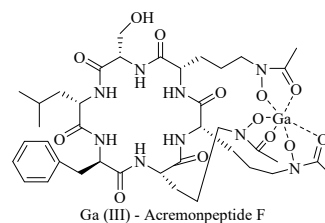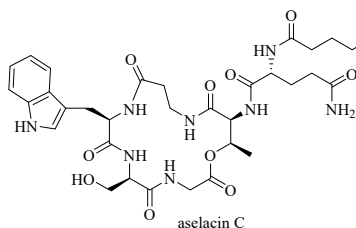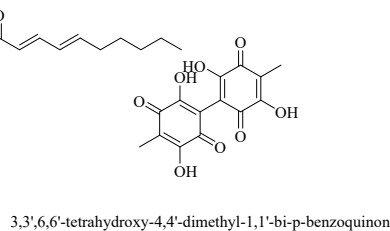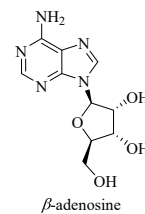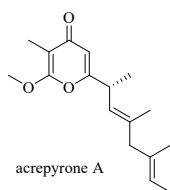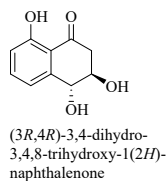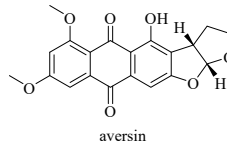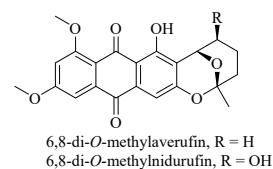

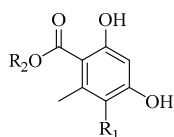

orsellinic acid,  $R_1 = H$ ,  $R_2 = H$   
ethyl orsellinate,  $R_1 = H$ ,  $R_2 = Et$   
5-chlororsellinic acid,  $R_1 = Cl$ ,  $R_2 = H$

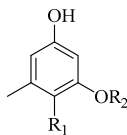

orcinol  $R_1 = H$ ,  $R_2 = H$   
*O*-methylorcinol,  $R_1 = H$ ,  $R_2 = Me$   
2-chloro-3,5-dihydroxytoluene,  $R_1 = Cl$ ,  $R_2 = H$   
aryl bromide  $R_1 = Br$ ,  $R_2 = H$

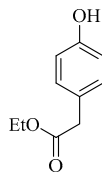

ethyl 4-hydroxyphenylacetate

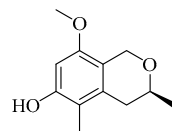

(3*S*)-3,5-dimethyl-8-methoxy-3,4-dihydro-1H-isochromen-6-ol

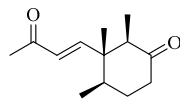

nectriatone C

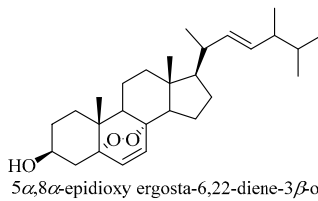

5 $\alpha$ ,8 $\alpha$ -epidioxy ergosta-6,22-diene-3 $\beta$ -ol

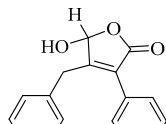

microperfurane

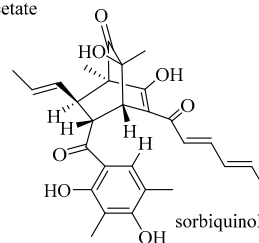

sorbiquinol

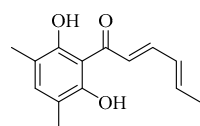

(2*E*,4*E*)-1-(2,6-dihydroxy-3,5-dimethyl-phenyl)hexa-2,4-dien-1-one

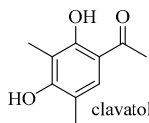

clavatul

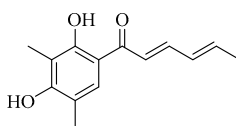

sorbicillin

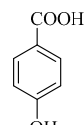

4-hydroxybenzoic acid

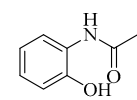

*N*-(2-hydroxyphenyl)-acetamide

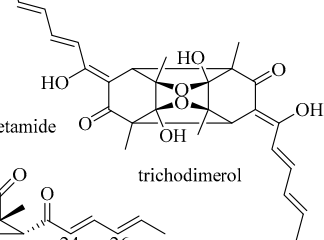

trichodimerol

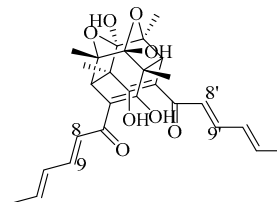

dihydrotrichodimerol: 8,9-dihydro  
tetrahydrotrichodimerol: 8,9-dihydro 8',9'-dihydro

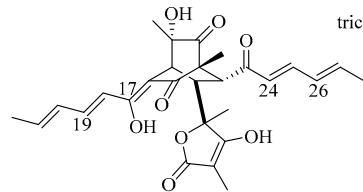

trichotetronine  
dihydrotrichotetronine : 24, 25-dihydro  
10,11-dihydrobislongiquinolide : 18, 19-dihydro  
10,11,16,17-tetrahydrobislongiquinolide : 18, 19-dihydro, 24, 25-dihydro

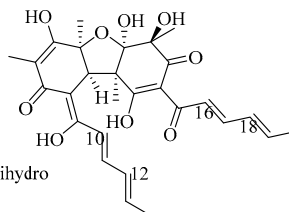

bisvertinolone  
dihydrobisvertinolone : 16, 17-dihydro  
tetrahydrobisvertinolone : 10, 11-dihydro, 16, 17-dihydro

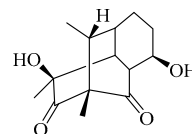

penicillone B

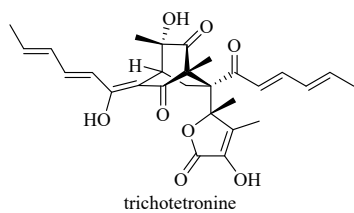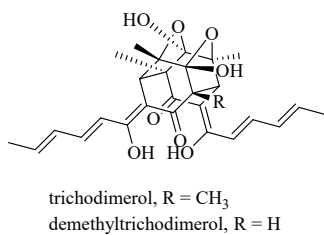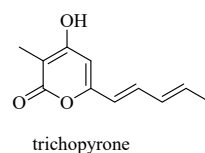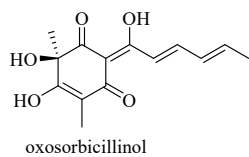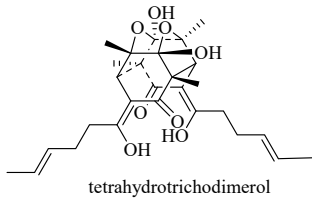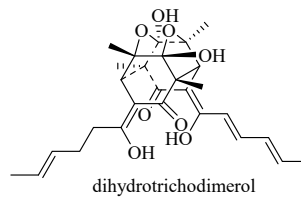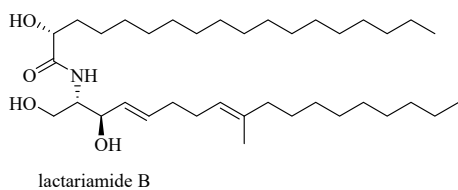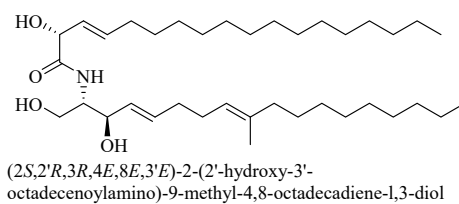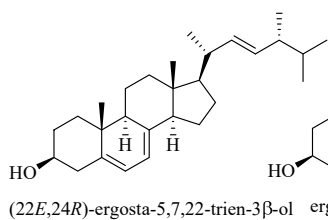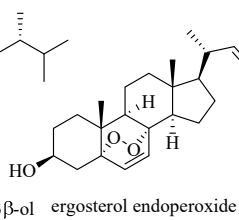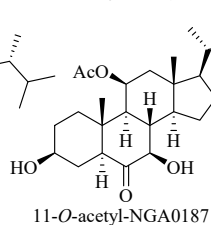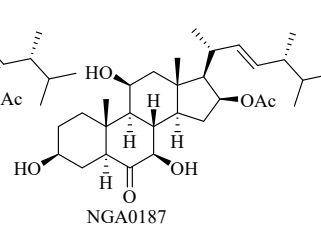

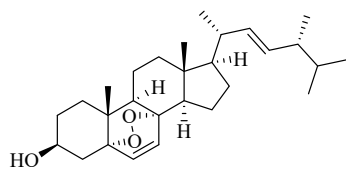

(22E)5 $\alpha$ ,8 $\alpha$ -epidioxyergosta-6,22-dien-3 $\beta$ -ol

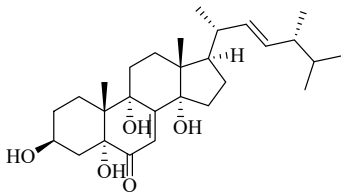

(22E,24R)3 $\beta$ ,5 $\alpha$ ,9 $\alpha$ ,14 $\alpha$ -tetrahydroxyergosta-7,22-dien-6-one

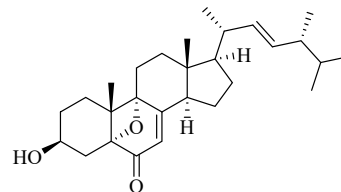

(22E,24R)-3 $\beta$ -hydroxy-5,9-epoxyergosta-7,22-dien-6-one

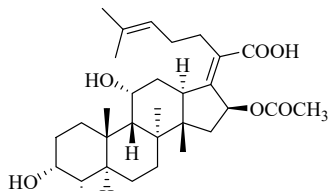

fusidic acid

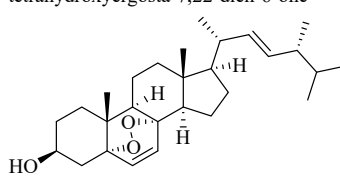

(22E,24R)-5 $\alpha$ ,8 $\alpha$ -epidioxy-ergosta-6,22dien-3 $\beta$ -ol

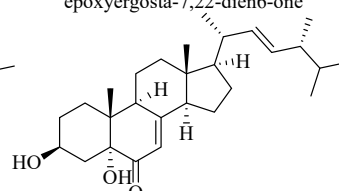

(3 $\beta$ ,5 $\alpha$ ,22E,24R)-dihydroxy-ergosta-7,22-dien-6-one

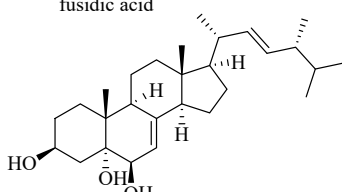

(3 $\beta$ ,5 $\alpha$ ,6 $\beta$ ,22E,24R)-trihydroxy-ergosta-7,22-dien-6-one

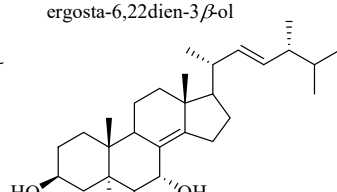

3 $\beta$ ,5 $\alpha$ ,6 $\beta$ ,7 $\alpha$ -tetrahydroxyergosta-8(14),22-diene

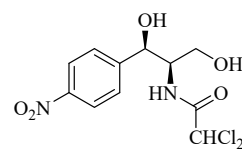

chloramphenicol

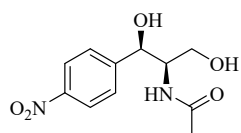

corynecin-I

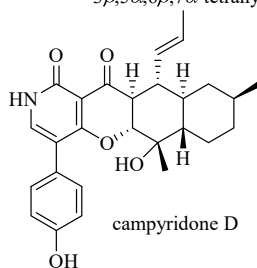

campyridone D

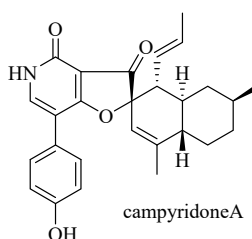

campyridoneA

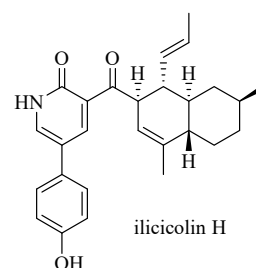

ilicicolin H

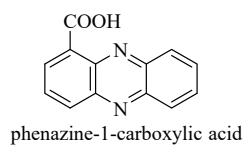

phenazine-1-carboxylic acid

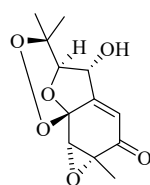

acremine P

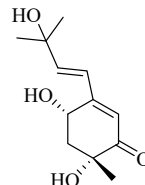

acremine A

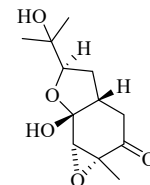

acremine Q
